# Supplementary material for: Selective quantification of nanoplastics in environmental matrices by asymmetric flow field-flow fractionation with total organic carbon detection
Source: Royal Society of Chemistry journal article supplement (doi:10.1039/d1cc04852j), 2021-01-01
Supplement: d1cc04852j1.pdf [file d1cc04852j1.pdf]

1                                          Electronic Supplementary Information for

2

3                                          **Selective quantification of nanoplastics in environmental matrices by**  
4 **asymmetric flow field – flow fractionation with total organic carbon detection**

5

6                                          Marfua Mowla<sup>a\*</sup>, Sheyda Shakiba<sup>a</sup>, and Stacey M. Louie<sup>a\*†</sup>

7

8                                          <sup>a</sup>Department of Civil and Environmental Engineering, University of Houston, Houston, TX,  
9                                          USA, 77204

10

11                                          \*Equal contribution

12

13                                          †Corresponding author:

14                                          Email: slouie@central.uh.edu

15                                          Phone: 1-713-743-8646

16

17

18                                          **Pages:** 30

19                                          **Figures:** 11

20                                          **Tables:** 2

|    |                                                                                               |    |
|----|-----------------------------------------------------------------------------------------------|----|
| 21 | <b>Table of Contents</b>                                                                      |    |
| 22 | S1. Materials and sample preparation .....                                                    | 3  |
| 23 | S1.1. Polystyrene (PS) nanoplastics .....                                                     | 3  |
| 24 | S1.2. Tween 20 (polysorbate 20) .....                                                         | 3  |
| 25 | S1.3. Kaolin clay .....                                                                       | 4  |
| 26 | S1.4. Elliott soil humic acid (ESHA) .....                                                    | 5  |
| 27 | S1.5. Nile red .....                                                                          | 5  |
| 28 | S2. Instrumentation and methods.....                                                          | 6  |
| 29 | S2.1. Batch dynamic light scattering (DLS) and electrophoretic light scattering (ELS).....    | 6  |
| 30 | S2.2. Attenuated total reflectance – Fourier transform infrared (ATR-FTIR) spectroscopy ..... | 6  |
| 31 | S2.3. Total organic carbon (TOC) analyzer (batch measurement mode).....                       | 6  |
| 32 | S2.4. AF4 instrumentation with online TOC analysis .....                                      | 7  |
| 33 | S3. Batch DLS and ELS characterization of PS nanoplastics and kaolin clay colloids .....      | 11 |
| 34 | S4. ATR-FTIR analysis of PS nanoplastics .....                                                | 13 |
| 35 | S5. Optimization of AF4 cross flow for nanoplastics separations.....                          | 14 |
| 36 | S6. Quantification of PS nanoplastics by gravimetric and TOC analysis .....                   | 16 |
| 37 | S7. LS and dRI detector signals for AF4 calibration runs on PS nanoplastic mixtures.....      | 20 |
| 38 | S8. Elution times and computed resolution for PS nanoplastics in AF4-UV and AF4-TOC .....     | 21 |
| 39 | S9. Calibration curves for AF4 analyses and limit of quantitation for AF4-TOC .....           | 23 |
| 40 | S9. AF4 analysis of clay and ESHA with individual 200 nm and 500 nm PS nanoplastics .....     | 25 |
| 41 | S10. Influence of clay concentration on AF4 separations and nanoplastics detection .....      | 26 |
| 42 | S11. AF4 analysis of PS nanoplastics in complex matrices after staining with Nile Red .....   | 28 |
| 43 | References .....                                                                              | 30 |

## 44 **S1. Materials and sample preparation**

### 45 S1.1. Polystyrene (PS) nanoplastics

46 PS nanoplastics were purchased at a nominal concentration of 1 wt % PS ( $10 \text{ g L}^{-1}$ ) with  
47 0.1 wt % Tween 20 surfactant ( $1 \text{ g L}^{-1}$ ) and 2 mM sodium azide preservative. Four sizes were  
48 obtained with nominal diameters of 50 nm, 100 nm, 200 nm, and 500 nm (and manufacturer-  
49 reported actual diameters of  $41 \pm 7 \text{ nm}$ ,  $124 \pm 17 \text{ nm}$ ,  $220 \pm 49 \text{ nm}$ , and  $541 \pm 144 \text{ nm}$ ). The  
50 nanoplastics were bath sonicated (CPXH 2800, Branson Ultrasonic Corporation, Brookfield, CT,  
51 USA) for 30 to 40 s immediately prior to use. For sample preparation, the stocks were either diluted  
52 to  $500 \text{ mg L}^{-1}$  in deionized water (DIW) for each of the four PS sizes, or prepared as a mixture  
53 containing  $500 \text{ mg L}^{-1}$  of each PS sizes from  $10 \text{ g L}^{-1}$  stock. The diluted mixture stock was further  
54 diluted in DIW to mixtures containing  $5 \text{ mg L}^{-1}$ ,  $10 \text{ mg L}^{-1}$ ,  $15 \text{ mg L}^{-1}$  and  $20 \text{ mg L}^{-1}$  of all four PS  
55 sizes as calibration standards for the asymmetric flow field – flow fractionation (AF4) analyses.  
56 For all other samples except where indicated otherwise, the individual PS sizes and mixtures were  
57 evaluated using  $20 \text{ mg L}^{-1}$  of each size of nanoplastics.

58 A gravimetric analysis was used to verify the mass concentrations of the PS stocks. 1 mL  
59 of PS stock of each size was added into pre-weighed 20 mL glass vials (which were pre-treated in  
60 a furnace at  $550 \text{ }^\circ\text{C}$  for 2 h, then cooled to room temperature) and lyophilized for 48 hours at 0.2  
61 mbar and  $-80 \text{ }^\circ\text{C}$  (FreeZone Freeze Dry system, Labconco Corporation, Kansas City, MO, USA).  
62 The dry mass of material was recorded; results are reported in Section S6.

### 63 S1.2. Tween 20 (polysorbate 20)

64 The PS stocks as purchased included Tween 20 (i.e., polysorbate 20). Pure Tween 20 was  
65 purchased (VWR International, Radnor, PA, USA) to prepare known samples for analysis on the  
66 total organic carbon (TOC) analyzer in order to correct measurements on the PS nanoplastics for

67 the Tween 20 contribution. The pure Tween 20 was serially diluted to  $\approx 20 \text{ g L}^{-1}$  and  $500 \text{ mg L}^{-1}$   
68 with DIW (with exact concentrations determined gravimetrically), and finally diluted to  $10 \text{ mg L}^{-1}$   
69 as C for batch TOC measurements.

### 70 S1.3. Kaolin clay

71 Hydrous aluminum silicate (kaolin clay) was acquired from BASF (ASP 600, BASF Corporation,  
72 Charlotte, NC, USA) with reported mean size of  $0.6 \mu\text{m}$ . This ASP 600 material was previously  
73 recommended to serve as the clay portion of simulated sediments.<sup>1-3</sup> Following prior methods for  
74 preparation,<sup>1</sup> the clay was first treated to remove any combustible organic matter as follows. A 40  
75 mL glass vial was first treated in a furnace (Lindberg Blue M, Thermo Scientific, Waltham, MA,  
76 USA) for  $550 \text{ }^\circ\text{C}$  for 2 h. Then, 10 g of clay was weighed into the vial and treated for  $550 \text{ }^\circ\text{C}$  for  
77 1 h. The mass loss of the clay was  $\approx 3.9 \text{ wt } \%$ . The treated clay was then used to prepare a  $1 \text{ g L}^{-1}$   
78 suspension in a 50 mL centrifuge tube (VWR International, Radnor, PA, USA), first by adding 2  
79 mL of DIW to the 35 mg of clay and bath sonicating for 3 minutes to wet the clay, then adding 13  
80 mL of DIW and probe sonicating the suspension (Fisherbrand Model 120 Sonic Dismembrator,  
81 Fisher Scientific, Hampton, NH, USA) for 15 minutes at 100% amplitude, 80% pulse cycle (8 s  
82 on, 2 s off) to disperse the clay. Note that 15 mL is the recommended maximum sample volume  
83 for the ultrasonication probe used. The remaining 20 mL of DIW was added after the probe  
84 sonication. The stock suspension was purified of large particles by centrifuging at 800 rpm  
85 ( $74.41\text{g}$ ) for 9.5 min in a fixed angle rotor ( $R_{\min} = 6.94 \text{ cm}$ ,  $R_{\max} = 10.4 \text{ cm}$ , F15-8x50cy rotor,  
86 Sorvall Legend XTR centrifuge, ThermoFisher Scientific, Hampton, NH, USA); this time was  
87 calculated to sediment particles larger than  $\approx 1 \mu\text{m}$ , assuming spherical particles with density  $2.65$   
88  $\text{g cm}^{-3}$ , as in prior research to process soil slurries for AF4 analyses.<sup>4</sup> The supernatant containing  
89 the clay colloids was collected and used for all further experiments and analyses, and the pH was

90 measured to be 5.91. The pelleted clay in the centrifuge tube was lyophilized at 0.2 mbar and -80  
91 °C for 24 h to determine the mass of clay removed and compute the remaining concentration of  
92 clay colloids in the supernatant as 570 mg L<sup>-1</sup>.

#### 93 S1.4. Elliott soil humic acid (ESHA)

94 ESHA (Standard V, Catalog # 5S102H) was purchased from the International Humic  
95 Substances Society (IHSS) and used to represent background dissolved organic matter that can be  
96 present in environmental samples. A soil humic acid was selected over aquatic natural organic  
97 matter for its higher molecular weight, which presents a greater challenge for separation from  
98 nanoplastics considering that a higher proportion of the ESHA will be retained in the AF4 analysis  
99 (using a 10 kDa ultrafiltration membrane as the accumulation wall). A stock solution of 2 g L<sup>-1</sup> of  
100 ESHA was prepared in DIW, adjusted to pH 7 with 1 M NaOH and 0.1 M HCl, and allowed to  
101 dissolve for 24 h on an end-over-end rotator at 25 rpm. The stock was then filtered using a 0.22  
102 µm polyethersulfone (PES) syringe filter (EMD Millipore, Burlington, MA, USA) and stored at 4  
103 °C for further use. The concentrations (as carbon) of the unfiltered and filtered stocks were 925  
104 mg<sub>C</sub> L<sup>-1</sup> and 780 mg<sub>C</sub> L<sup>-1</sup>, respectively, as determined by batch TOC analysis (Section S2.3).

#### 105 S1.5. Nile Red

106 Nile Red dye (99%, pure, Acros Organics, Fair Lawn, NJ, USA) was prepared at 1 g L<sup>-1</sup> in  
107 methanol (ultrapure HPLC grade, Alfa Aesar, Ward Hill, MA, USA), bath sonicated to dissolve,  
108 and kept in the dark at 4 °C for further use. For fluorescent labeling, samples were spiked with 10  
109 mg L<sup>-1</sup> of Nile Red directly from the 1 g L<sup>-1</sup> stock.

110

111

## 112 **S2. Instrumentation and methods**

### 113 S2.1. Batch dynamic light scattering (DLS) and electrophoretic light scattering (ELS)

114 Batch DLS and ELS measurements were collected on the PS nanoplastics and clay colloids  
115 on a Zetasizer Nano ZS instrument (Malvern Instruments, Westborough, MA, USA). For both  
116 measurements, samples were equilibrated at 25 °C in the instrument compartment for 2 min, and  
117 five measurement replicates per sample were collected and averaged. For DLS, cumulants analysis  
118 was applied to obtain  $z$ -average sizes. For ELS, samples were loaded into a disposable folded  
119 capillary cell (DTS1070, Malvern Instruments, Westborough, MA, USA). The automatic voltage  
120 setting was applied (149 V) with a minimum of 30 runs per measurement, and the Smoluchowski  
121 model was used to compute zeta potential from the electrophoretic mobility.

### 122 S2.2. Attenuated total reflectance – Fourier transform infrared (ATR-FTIR) spectroscopy

123 ATR-FTIR spectra were collected from 4000 to 680  $\text{cm}^{-1}$  (resolution of 4  $\text{cm}^{-1}$ , 100 scans  
124 averaged) on a Nicolet iS10 FTIR spectrophotometer equipped with a DTGS KBr detector and  
125 OMNI-Sampler accessory and a Ge ATR crystal. The ATR crystal was cleaned with isopropanol  
126 and DIW and dried to collect a background spectrum immediately prior to each sample deposition.  
127 Then, 5  $\mu\text{L}$  of the PS nanoplastics stock (as purchased without any further processing) was  
128 deposited onto the ATR crystal and allowed to dry. The sample spectrum of the dry nanoplastics  
129 was processed by subtracting the background spectrum, as well as adding or subtracting water  
130 vapor peaks as needed to correct for any differences in water vapor absorbances between the  
131 sample and background spectra.

### 132 S2.3. Total organic carbon (TOC) analyzer (batch measurement mode)

133 A portable TOC analyzer (Sievers M9 SEC, Suez, Trevoise, PA, USA) was used for both  
134 batch and online TOC analysis. 6 M phosphoric acid (Suez, Trevoise, PA, USA) was used to acidify

135 the sample for inorganic carbon removal. The oxidizer was prepared using 150 g L<sup>-1</sup> of ammonium  
136 persulfate (98% extra pure, Acros Organics, Fair Lawn, NJ, USA) in phosphate buffer (17 g L<sup>-1</sup>  
137 NaH<sub>2</sub>PO<sub>4</sub> and 52.8 g L<sup>-1</sup> Na<sub>2</sub>HPO<sub>4</sub>·7H<sub>2</sub>O) with UV activation to oxidize organic carbon to CO<sub>2</sub>,  
138 which then transfers across a selective permeable membrane and is converted to bicarbonate for  
139 detection by conductivity. Both NaH<sub>2</sub>PO<sub>4</sub> (anhydrous, ≥ 98%, reagent grade) and Na<sub>2</sub>HPO<sub>4</sub>·7H<sub>2</sub>O  
140 (ACS grade) were purchased from VWR Life Science (Solon, OH, USA).

141 Sample was introduced to the TOC analyzer at 0.5 mL min<sup>-1</sup>, with acid and oxidizer  
142 continuously injected at 2 μL min<sup>-1</sup> and 4 μL min<sup>-1</sup>, respectively. For batch analysis, the instrument  
143 was flushed with each sample for 10 min, followed by six measurements (2 min each). The mean  
144 of the last three measurements was taken. Calibration of the analyzer was verified using potassium  
145 hydrogen phthalate (KHP) standards (99.99%, acidimetric standard, ACROS Organics, Fair Lawn,  
146 NJ, USA). The batch mode analysis was applied to obtain measured carbon concentrations in the  
147 PS nanoplastics, Tween 20, and ESHA, as reported in Section S6.

#### 148 S2.4. AF4 instrumentation with online TOC analysis

149 In our instrumental setup, a Wyatt Eclipse AF4 module (Wyatt Technology, Santa Barbara,  
150 CA, USA) is attached to an Agilent 1290 Infinity high performance liquid chromatography  
151 (HPLC) system (Agilent Technologies, Santa Clara, CA, USA) with a binary pump, degasser, and  
152 autosampler. The AF4 short channel (Wyatt Technology) was used with a wide spacer with 250  
153 μm height and a 10 kDa regenerated cellulose (RC) membrane (Ultracel PLCGC, MilliporeSigma,  
154 St. Louis, MO, USA) that was die cut in-house. The mobile phase was 0.15 mM Na<sub>2</sub>SO<sub>4</sub> (prepared  
155 from Na<sub>2</sub>SO<sub>4</sub>·10H<sub>2</sub>O, 99+%, ACROS Organics, Fair Lawn, NJ, USA). The detector and injection  
156 flow rates were set as 0.5 mL min<sup>-1</sup> and 0.2 mL min<sup>-1</sup>, respectively. The injection volume was 100  
157 μL. Table S1 presents the optimized AF4 method (see Section S5 for details).

**Table S1.** AF4 method

| Mode                | Duration (min) | Cross flow (mL min <sup>-1</sup> ) |
|---------------------|----------------|------------------------------------|
| Elution             | 6              | 0.7                                |
| Focus               | 1              | 2.0                                |
| Focus + injection   | 4              | 2.0                                |
| Elution             | 58*            | 0.7                                |
| Elution + injection | 15             | 0                                  |
| Elution             | 6              | 0                                  |
| Elution             | 10             | 0.7                                |

159 \*For samples containing clay, the elution time was increased to 88 min instead of 58 min to allow  
 160 full elution of the particles

161  
 162 The downstream detectors included a UV–Vis diode array detector (DAD, Agilent 1260  
 163 Infinity), fluorescence detector (FLD) (Agilent 1260 Infinity), multi-angle light scattering (MALS)  
 164 detector (Wyatt DAWN HELEOS II, Wyatt Technology) equipped with a dynamic light scattering  
 165 (DLS) or quasi-elastic light scattering (QELS) detector (Wyatt Technology), differential refractive  
 166 index (dRI) detector (Optilab T-rEX, Wyatt Technology), and total organic carbon (TOC) detector  
 167 (Sievers M9-SEC portable TOC analyzer, Suez Water Technologies, Trevoise, PA, USA). The  
 168 order of online detectors after the AF4 channel was UV–Vis, MALS/DLS, FLD, dRI, and TOC,  
 169 based on the pressure rating of the flow cells and the fact that TOC is a destructive measurement.

170 The UV absorbance was monitored at 280 nm with the full spectra collected from 190 nm  
 171 to 600 nm (step 2 nm). The FLD emission and excitation wavelengths were optimized following  
 172 the instrument manual.<sup>5</sup> Briefly, the Nile Red stained nanoplastics (PS mixtures with 20 mg L<sup>-1</sup> of  
 173 each size particle and 10 mg L<sup>-1</sup> of Nile Red) were injected with AF4 separation, first with a fixed  
 174 excitation wavelength to identify the value of peak emission wavelength. Initial wavelengths were  
 175 selected using the fluorescence spectrum reported by Gagné et al.<sup>6</sup> After that, the samples were



176 injected with the identified maximum emission wavelength fixed, and the excitation was scanned  
177 to obtain the peak excitation wavelength. The procedure was reiterated on the peak excitation  
178 wavelength to identify the maximum emission wavelength. Finally, the photomultiplier tube  
179 (PMT) gain was optimized to achieve a higher signal but within the range below detector saturation  
180 ( $< 220$  LU). The final optimized emission and excitation wavelengths for the FLD were 620 nm  
181 and 230 nm, respectively, and the PMT gain was 15. The FLD spectra were also set to collect in  
182 multi-emission mode from 500 to 800 nm at a 10 nm step size. For DLS, a measurement duration  
183 of 2 s was used.

184         The TOC detector was used in online mode (i.e., routing the eluting flow from the AF4  
185 system directly to the TOC analyzer), with turbo mode enabled to collect TOC measurements  
186 every 4 s. The acid and oxidizer solutions were the same as described in Section S2.3 and injected  
187 at  $2 \mu\text{L min}^{-1}$  and  $4 \mu\text{L min}^{-1}$ , respectively. Data from the TOC detector were directly collected  
188 into both the Agilent OpenLab ChemStation and Wyatt ASTRA software (v. 7.3.2.19) during the  
189 chromatographic runs. Integrating the TOC data collection with Agilent OpenLab ChemStation  
190 required an Agilent 1200 Infinity Universal Interface Box II to receive an analog voltage signal.  
191 The Wyatt instruments can receive an analog voltage signal directly; here, the UV and FLD signals  
192 were collected through the DAWN HELEOS II and the TOC signal through the Optilab T-rEX. It  
193 is noted that the TOC detector outputs an analog current signal (which must be converted to a  
194 voltage) and digital MODBUS TCP/IP data. The data resolution of the analog signal was too low  
195 to achieve good chromatographic data whenever a wide concentration range was required to fully  
196 observe all eluting species. Therefore, a custom digital-analog converter was produced to generate  
197 a higher resolution voltage signal using the MODBUS output.<sup>7</sup> A conversion factor of  $(1.000$   
198  $\text{Vdc})/(10 \text{ mg}_C \text{ L}^{-1})$  generally yielded good resolution for the samples here.

199 For data integration across all detectors (and verification of the system cleanliness and  
200 proper functioning of all detectors), bovine serum albumin (BSA, 1 g L<sup>-1</sup>) was run on the AF4. For  
201 BSA separation, the mobile phase was 4 mM phosphate buffer (pH 7) with 25 mM Na<sub>2</sub>SO<sub>4</sub>. The  
202 phosphate buffer composition was 0.23 g L<sup>-1</sup> KH<sub>2</sub>PO<sub>4</sub> (anhydrous ACS grade, Amresco, Solon,  
203 OH, USA) and 0.62 g L<sup>-1</sup> Na<sub>2</sub>HPO<sub>4</sub>·7H<sub>2</sub>O. The AF4 method was: (1) elution (1 min); (2) focus (1  
204 min); (3) focus + injection (3 min); (4) focus (2 min); (5) elution (30 min); (6) elution + injection  
205 (2 min); and (7) elution (1 min). The cross flow was held constant at 3 mL min<sup>-1</sup> during all steps.  
206 Data were processed using ASTRA software (v. 7.3.2.19, Wyatt Technology). The BSA monomer  
207 peak was used as a monodisperse peak for UV, FLD, MALS, and dRI signal alignment and band  
208 broadening, as well as an isotropic scatterer for MALS detector normalization. For the TOC  
209 analyzer, only alignment was conducted in order to preserve the actual peak widths in order to  
210 compare the dispersion or resolution in the TOC to other online detectors.

211 For particle size analysis, we obtained the radius of gyration ( $R_g$ ) and hydrodynamic radius  
212 ( $R_h$ ) using the MALS and DLS detectors, respectively, in the ASTRA software. To obtain  $R_g$ , the  
213 2<sup>nd</sup> order Berry model was used, which has previously been shown to have relatively low error for  
214 polymeric spheres with sizes of 50 nm, 100 nm, and 500 nm.<sup>8</sup> MALS signals at angles that showed  
215 either a low signal to noise ratio, or a saturated signal (typically only observed for the 500 nm  
216 nanoplastics) were excluded from analysis. Size data are plotted across the full width at half  
217 maximum (FWHM) of the DLS signal. It is further noted that the online DLS detector was moved  
218 to position 16 (134°), a higher angle than the default installation (position 12), to achieve better  
219 accuracy for particles with radius larger than 75 nm.<sup>9</sup> Additionally, to mitigate contributions of  
220 flow artifacts at long timescales in the DLS analysis, we excluded data at decay times  $> 4 \times 10^{-3}$  s  
221 when processing the autocorrelation function by cumulants analysis.

### 222 **S3. Batch DLS and ELS characterization of PS nanoplastics and kaolin clay colloids**

223 Batch DLS measurements on the PS nanoplastics and clay are presented in Figure S1a. For  
224 complex mixtures comprised of 235 mg L<sup>-1</sup> of clay with 20 mg L<sup>-1</sup> of PS nanoplastics (either  
225 individually, or a mixture comprised of 20 mg L<sup>-1</sup> of each size of nanoplastics together, i.e., 80 mg  
226 L<sup>-1</sup> of total nanoplastics), the batch DLS sizes of the mixtures reflect primarily the size of the clay  
227 colloids present in higher concentration. Hence, the batch DLS analysis is not able to identify or  
228 characterize PS nanoplastics in the presence of the background colloids. The zeta potentials of the  
229 four PS nanoplastics and clay were also measured with and without ESHA (concentration of 10  
230 mg<sub>C</sub> L<sup>-1</sup>), as shown in Figure S1b. Measurements were taken in the same background as the AF4  
231 mobile phase (0.15 mM Na<sub>2</sub>SO<sub>4</sub>). All particles showed a negative zeta potential, with more  
232 strongly negative zeta potentials observed after the addition of ESHA, suggesting adsorption of  
233 the negatively charged ESHA to all particles (PS and clay). The origin of the negative surface  
234 charge on the PS nanoplastics as purchased (without ESHA) is not apparent, given that pristine PS  
235 as well as the Tween 20 surfactant used in the PS stock are both expected to be nonionic. The zeta  
236 potentials of the PS nanoplastics were also measured in an approximately equivalent ionic strength  
237 of 0.5 mM sodium nitrate (NaNO<sub>3</sub>) (Thermo Fisher Scientific, Fair Lawn, NJ, USA) as opposed  
238 to 0.15 mM Na<sub>2</sub>SO<sub>4</sub> and similarly showed negative charges, indicating that SO<sub>4</sub><sup>2-</sup> adsorption from  
239 the background solution is not responsible for the negative charge.

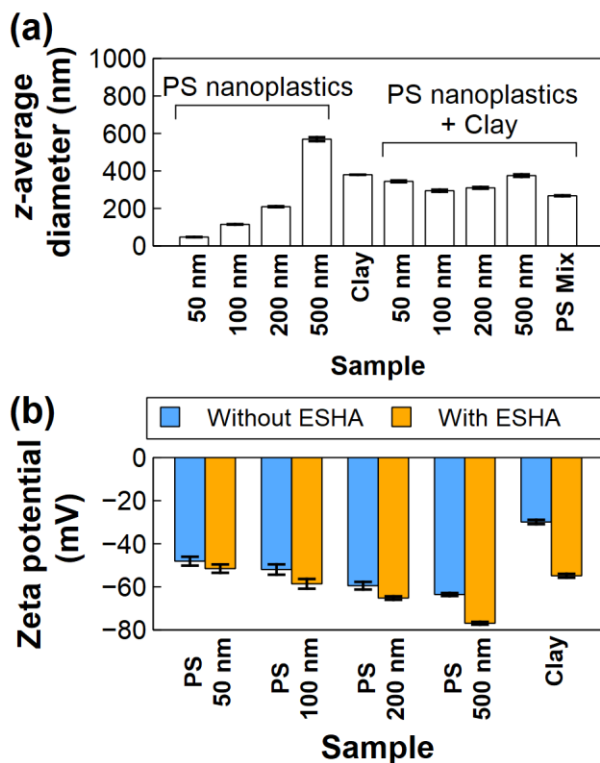

240

241 **Figure S1.** Batch z-average diameters of individual PS nanoplastics, the clay colloid stock,  
 242 individual PS nanoplastics with clay, and the mixture of the four PS nanoplastic sizes with clay  
 243 (a), and zeta potentials of the individual PS nanoplastics and clay without and with ESHA (b). All  
 244 PS samples were prepared with 20 mg L<sup>-1</sup> of each nanoplastics size and/or 235 mg L<sup>-1</sup> of clay in  
 245 0.15 mM Na<sub>2</sub>SO<sub>4</sub> (i.e., matching the AF4 conditions), except the size of the clay stock was  
 246 measured as collected at 570 mg L<sup>-1</sup> in deionized water. Error bars represent the standard deviation  
 247 of five measurement replicates.

248

#### 249 S4. ATR-FTIR analysis of PS nanoplastics

250 ATR-FTIR spectra for the PS nanoplastics stocks are provided in Figure S2. All samples  
251 show the expected FTIR absorbance peaks for PS at 698 and 757  $\text{cm}^{-1}$  (C–H out-of-plane bending  
252 vibration of the aromatic ring), 1452  $\text{cm}^{-1}$  (C–H deformation of  $\text{CH}_2$ ), 1493  $\text{cm}^{-1}$  (C–H stretching  
253 vibration of ring in plane), 1602  $\text{cm}^{-1}$  (C–C stretching frequency of ring in plane), 2851  $\text{cm}^{-1}$  (C–  
254 H symmetrical stretching vibration of  $\text{CH}_2$ ), 2923 (C–H asymmetrical stretching vibration of  $\text{CH}_2$ ),  
255 and 3025, 3060, and 3082  $\text{cm}^{-1}$  (C–H aromatic stretching vibration). All PS peak assignments are  
256 those reported by Bhutto et al.<sup>10</sup> Additional peaks at 1120  $\text{cm}^{-1}$  and 2038  $\text{cm}^{-1}$  are observed in the  
257 50 nm and 500 nm PS stocks; the 1120  $\text{cm}^{-1}$  peak may be attributable to C–O in the Tween 20  
258 surfactant. The weak absorbance at  $> 3100 \text{ cm}^{-1}$  may also be attributed to O–H in Tween 20. It is  
259 noted that the 200 nm PS (which resisted uptake of Nile Red) shows absorbances at 1697  $\text{cm}^{-1}$   
260 (typically attributed to C=O groups) and 1220  $\text{cm}^{-1}$  that are not observed in the other PS stocks.

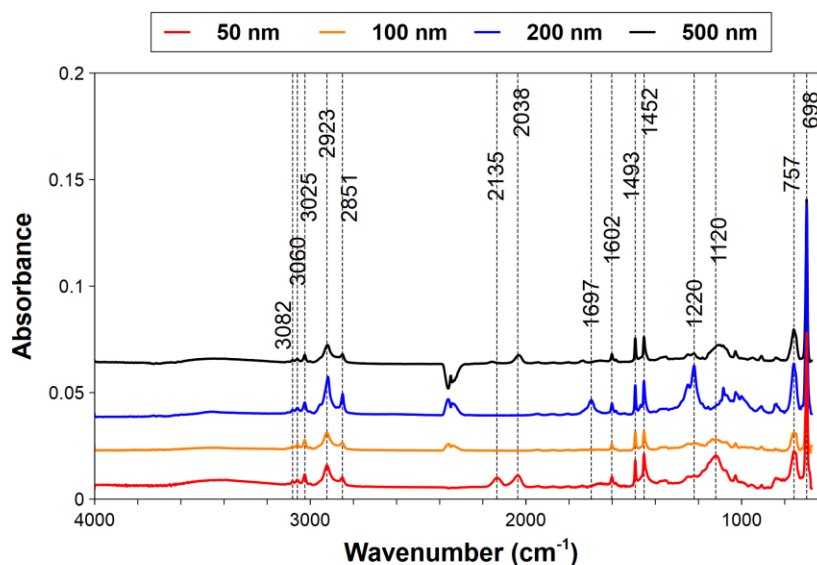

261  
262 **Figure S2.** ATR-FTIR spectra of the four PS nanoplastics from the stocks as purchased (5  $\mu\text{L}$   
263 deposited from stock suspensions of nominal 10  $\text{g L}^{-1}$  of PS with 1  $\text{g L}^{-1}$  of Tween 20 surfactant).  
264 All spectra are presented at a common scale but staggered for clarity of visualization.  
265

## 266 **S5. Optimization of AF4 cross flow for nanoplastics separations**

267 The AF4 cross flow was first optimized for size separation of the four sizes of nanoplastics  
268 (50 nm, 100 nm, 200 nm, and 500 nm) using an AF4 channel height of 250  $\mu\text{m}$  and 10 kDa  
269 regenerated cellulose ultrafiltration membrane as the accumulation wall. The nanoplastics were  
270 diluted in deionized water from the purchased stocks at nominal concentrations of 20  $\text{mg L}^{-1}$  of  
271 each of the four sizes. The flow was fixed at 2  $\text{mL min}^{-1}$  for 4 min, and constant cross flows ranging  
272 from 0.3  $\text{mL min}^{-1}$  to 1.0  $\text{mL min}^{-1}$  were evaluated (Figure S3). It is noted that polyvinyl alcohol  
273 (PVA) was injected as a surfactant that could potentially reduce AF4 membrane fouling (i.e.,  
274 improve nanoparticle recovery) in prior injections before analyzing the PS mixtures. Residual PVA  
275 in the system was released as a void peak at the beginning of each run; although the PVA does not  
276 show a UV absorbance (Figure S3a), the TOC detector was sensitive to PVA in the void peak  
277 (Figure S3b, peak labeled with an asterisk). Separation of the smallest (50 nm) nanoplastics from  
278 this void peak was also considered in selecting the optimal cross flow. (For all subsequent  
279 experiments, no surfactant was introduced so that no void peak is observed in the PS nanoplastics  
280 except when intentionally adding humic acids to the sample).

281 Increasing the cross flow from 0.3  $\text{mL min}^{-1}$  to 0.85  $\text{mL min}^{-1}$  resulted in better separation  
282 of peak elution times for the four particle sizes, and especially better separation of the 50 nm  
283 nanoplastics from the void peak. However, higher cross flow also resulted in more extensive peak  
284 broadening, and increasing cross flow further to 1.0  $\text{mL min}^{-1}$  resulted in a substantial overlap of  
285 the 200 nm and 500 nm peaks. Gradient elution has previously been recommended for polydisperse  
286 nanoplastics analysis by AF4.<sup>11</sup> Here, a method was tested starting with 1.0  $\text{mL min}^{-1}$  constant  
287 cross flow held for 20 min to separate the void, 50 nm, and 100 nm peaks, followed by an  
288 exponential cross flow decay to 0.5  $\text{mL min}^{-1}$  over the next 38 min), but poor separation of the 200

289 nm and 500 nm nanoplastics was observed. Hence,  $0.7 \text{ mL min}^{-1}$  was selected as the optimal cross  
290 flow for providing the most distinct separation of the void peak and each size of nanoplastics.

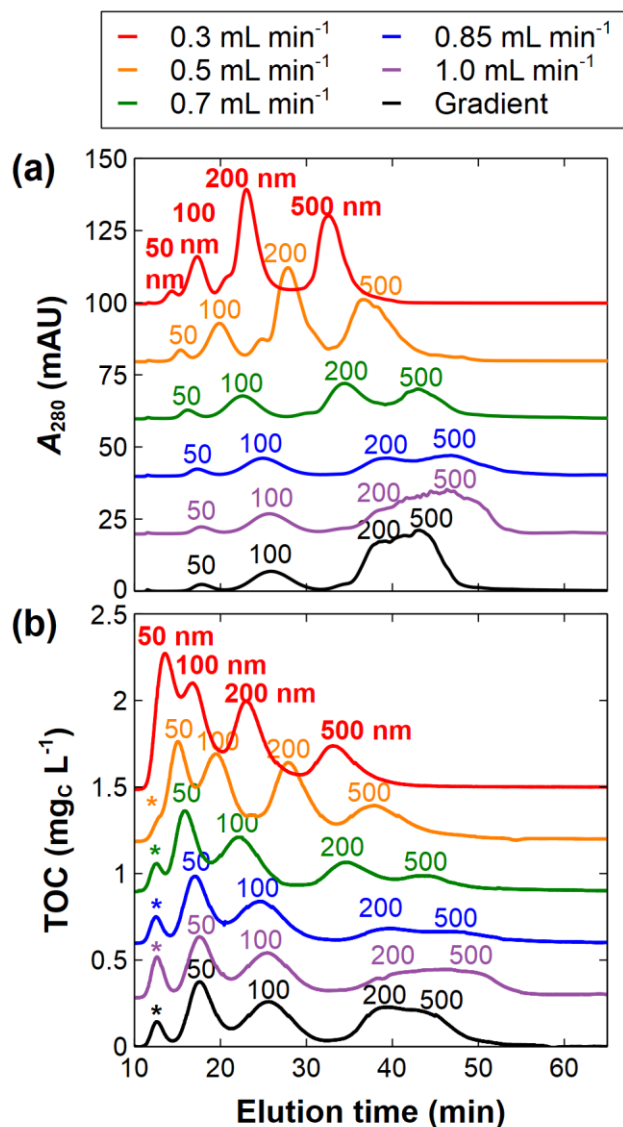

291  
292 **Figure S3.** Cross flow optimization for AF4 separation of PS nanoplastics mixtures (50 nm, 100  
293 nm, 200 nm, and 500 nm, each at a nominal concentration of  $20 \text{ mg L}^{-1}$ ) with UV (a) and TOC (b)  
294 detection. The asterisk (\*) denotes residual polyvinyl alcohol surfactant introduced prior to the  
295 analyses that elutes as a void peak immediately after releasing the focus flow and initiating the  
296 elution step. All chromatograms are presented at a common scale but staggered (i.e., baseline  
297 shifted) for clarity of visualization.  
298

299 **S6. Quantification of PS nanoplastics by gravimetric and TOC analysis**

300 To thoroughly evaluate the capability of the TOC analyzer to quantify the mass  
301 concentration of PS nanoplastics, a series of measurements were compared to evaluate both the  
302 concentration of the stocks as purchased as well as to quantify losses in efficiency or recovery of  
303 the PS nanoplastics in all stages of the measurement (oxidation in the TOC analyzer, losses in the  
304 overall AF4 system such as the injection loop and tubing, and losses during AF4 separation). The  
305 measurements are summarized in Figure S4 and discussed in detail hereafter.

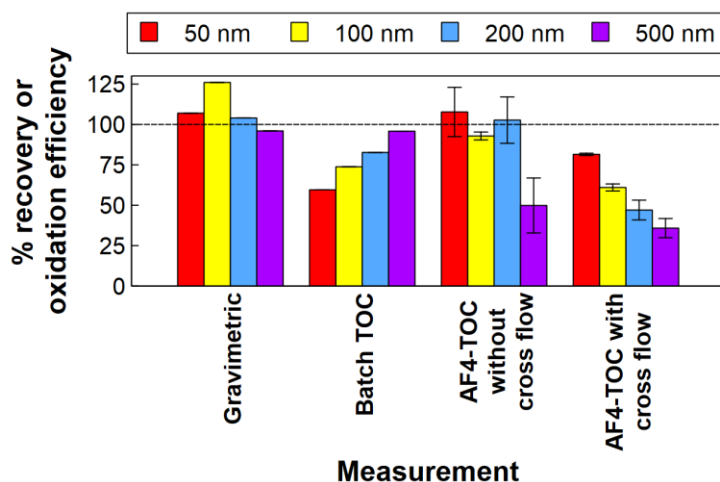

306 **Figure S4.** Recovery or oxidation efficiency of the four sizes of PS nanoplastics. Gravimetric  
307 measurements represent % mass measured relative to the nominal (expected) mass after  
308 lyophilization of the as-purchased PS stock suspensions, batch TOC measurements represent the  
309 oxidation efficiency (after correcting for the gravimetric results), AF4-TOC without cross flow  
310 represents the % recovery of individual sizes of nanoplastics injected to the AF4 system without  
311 separation, and AF4-TOC with cross flow represents the % recovery of nanoplastics from a  
312 mixture of all four sizes with separation applied. The expected contribution of Tween 20 surfactant  
313 in the stocks was subtracted from all measurements except AF4-TOC with cross flow (where *in*  
314 *situ* purification is achieved). Error bars on the AF4-TOC measurements represent the standard  
315 deviation across triplicate AF4 runs.

317



318 Gravimetric measurements were conducted on each size of PS nanoplastics (50 nm, 100  
319 nm, 200 nm, and 500 nm) to verify the total mass concentrations of nonvolatile material after  
320 lyophilization of 1 mL of each stock (method described in Section S1.1). The concentration of  
321 Tween 20 was assumed to be exact (i.e., 0.1 wt % or 1 g L<sup>-1</sup> as reported), and the expected mass  
322 of Tween 20 ( $m_{\text{Tween 20}}$ ) was hence subtracted from the total measured mass ( $m_{\text{measured}}$ ) to determine  
323 the PS mass “recovery” relative to the nominal PS mass ( $m_{\text{nominal,PS}}$ ), as in Equation S1 for 1 mL  
324 of stock:

$$325 \quad \text{PS mass recovery} = \frac{m_{\text{measured}} - m_{\text{Tween 20}}}{m_{\text{nominal,PS}}} = \frac{m_{\text{measured}} - 1 \text{ mg}}{10 \text{ mg}} \quad (\text{S1})$$

326 The mass recovery from this analysis (Figure S4, “Gravimetric”) could then be used to adjust  
327 nominal mass concentrations to “true” mass concentrations of PS.

328 Batch TOC measurements were then collected on the four individual PS stocks to evaluate  
329 the oxidation efficiency of the nanoplastics without having to consider issues of incomplete  
330 recovery from the AF4 system. The as-purchased stocks were diluted in deionized water to a  
331 nominal concentration of 5 mg L<sup>-1</sup> PS with 0.5 mg L<sup>-1</sup> Tween 20 surfactant (based on the reported  
332 manufacturer stock concentration of 1 wt % or 10 g L<sup>-1</sup> PS). Expected mass concentrations,  $C$ ,  
333 were converted to concentrations as carbon using the wt % carbon from the chemical formulas for  
334 Tween 20 or PS. The Tween 20 contribution to the TOC measurement ( $\text{TOC}_{\text{Tween 20}}$ ) was subtracted  
335 from the total measured TOC concentration ( $\text{TOC}_{\text{measured}}$ ), with the oxidation efficiency in the TOC  
336 analyzer measured independently as 92.4% by batch TOC analysis of a known Tween 20  
337 concentration diluted in deionized water to 10 mg<sub>C</sub> L<sup>-1</sup> from pure Tween 20 stock. After correcting  
338 the nominal concentrations to the “true” PS concentrations and accounting for the known wt %  
339 carbon in polystyrene (92.3 wt % C), the oxidation efficiencies for each size of PS nanoplastics  
340 were computed (Equation S2):

$$\begin{aligned}
341 \quad \text{PS oxidation efficiency} &= \frac{TOC_{\text{measured}} - TOC_{\text{Tween 20}}}{C_{\text{nominal,PS}} (\% \text{ C})_{\text{PS}} (\text{Mass recovery})_{\text{PS,gravimetric}}} \\
342 \quad &= \frac{TOC_{\text{measured}} - C_{\text{Tween 20}} (\% \text{ C})_{\text{Tween 20}} (\text{Oxidation efficiency})_{\text{Tween 20}}}{C_{\text{nominal,PS}} (\% \text{ C})_{\text{PS}} (\text{Mass recovery})_{\text{PS,gravimetric}}} \\
343 \quad &= \frac{TOC_{\text{measured}} - (0.5 \text{ mg L}^{-1} \text{ Tween 20}) \left(0.567 \frac{\text{g C}}{\text{g Tween 20}}\right) \left(0.924 \frac{\text{g C oxidized}}{\text{g C in Tween 20}}\right)}{(5 \text{ mg L}^{-1} \text{ nominal PS}) \left(0.923 \frac{\text{g C}}{\text{g PS}}\right) (\text{Mass recovery})_{\text{PS,gravimetric}}} \quad (\text{S2})
\end{aligned}$$

344 After gravimetric correction, the results (Figure S4, “Batch TOC”) suggest that oxidation  
345 efficiency in the TOC analyzer declines as particle size decreases. The reason for this observed  
346 trend is not evident, considering that the smaller nanoplastics have higher surface area to volume  
347 exposed for reaction with the persulfate oxidant in the TOC analysis. In addition, the PS particle  
348 density is not expected to vary with size,<sup>12</sup> although there may be a variable surfactant density  
349 profile in the particles.<sup>13</sup> In any case, these results suggest that oxidation efficiency should be  
350 considered to accurately interpret the quantitative TOC measurements.

351 The TOC was then evaluated in online mode, first for injections of each of the four  
352 individual sizes of PS nanoplastics into the completely assembled AF4 system (i.e., with the AF4  
353 channel online) with no focus or cross flow applied for separation (Figure S4, “AF4-TOC without  
354 cross flow”). Samples were injected at nominal concentrations of 20 mg L<sup>-1</sup> PS with 2 mg L<sup>-1</sup>  
355 Tween 20 surfactant. The total mass of C measured in the unseparated sample ( $m_{\text{C,measured}}$ ) was  
356 determined by multiplying the peak area by the flow rate. Corrections were again made to subtract  
357 the Tween 20 contribution ( $m_{\text{C,Tween 20}}$ ) and to adjust the nominal mass of PS ( $m_{\text{nominal,PS}}$ ) for both  
358 the “true” PS concentration and the oxidation efficiency measured in the gravimetric and batch  
359 TOC measurements, respectively (Equation S3):

$$360 \quad \text{PS recovery} = \frac{m_{\text{C,measured}} - m_{\text{C,Tween 20}}}{m_{\text{nominal,PS}} (\% \text{ C})_{\text{PS}} (\text{Mass recovery})_{\text{PS,gravimetric}} (\text{Oxidation efficiency})_{\text{PS}}} \quad (\text{S3})$$

361 Nearly 100% recovery was achieved for the 50 nm, 100 nm, and 200 nm nanoplastics, validating  
362 the TOC measurements in the online mode. Lower recovery for the 500 nm nanoplastics likely

363 represents fouling of the AF4 system rather than incomplete oxidation in the TOC analyzer, as  
364 recovery was initially high (80 %) but declined with subsequent injections.

365 Finally, TOC recovery was evaluated in the AF4-TOC analysis on mixtures of nominal 20  
366 mg L<sup>-1</sup> of each size of PS nanoplastics with 0.7 mL min<sup>-1</sup> cross flow applied for size separation  
367 (Figure S4, “AF4-TOC with cross flow”). Because the Tween 20 surfactant is removed through  
368 the ultrafiltration membrane in the AF4 channel during sample focusing, Equation S3 was applied  
369 without the Tween 20 subtraction to compute recovery. Declining recovery was observed with  
370 increasing particle size. Given that the online TOC measurements were largely validated in the  
371 prior analysis without cross flow, incomplete recovery is attributed to loss onto the AF4 membrane  
372 during the focus or elution stages, with larger particles that reside nearer to the membrane showing  
373 higher losses. It is noted that for clarity of analysis, the calibration curves in Section S9 (measured  
374 across four PS concentrations) are reported for the peak areas directly as collected, without  
375 applying corrections for the gravimetric analysis or oxidation efficiency.

376

377

378

379 **S7. LS and dRI detector signals for AF4 calibration runs on PS nanoplastic mixtures**

380 In addition to the UV and TOC detectors coupled to the AF4 (shown in Figure 1), light  
381 scattering and dRI detectors were also included online. AF4 chromatograms for the light scattering  
382 signal at the 90 ° detector (LS11) and dRI detector are provided in Figure S5.

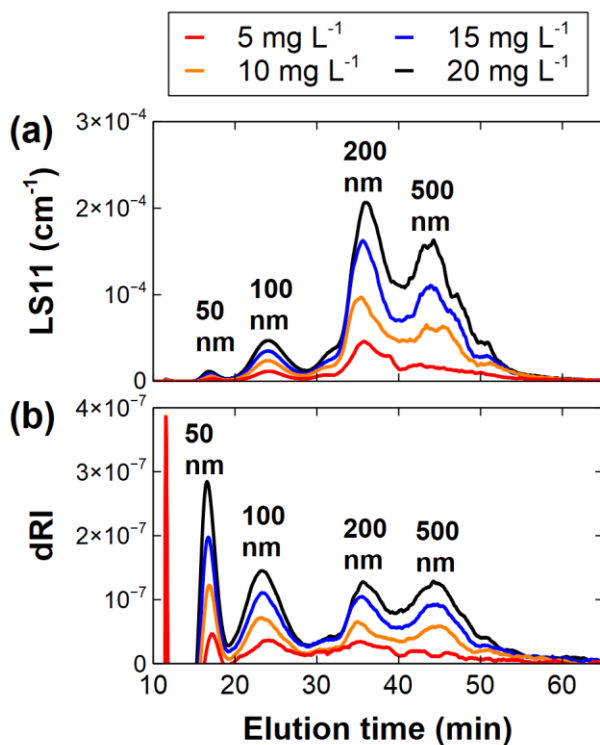

383  
384 **Figure S5.** AF4 chromatograms for the LS11 detector (a) and dRI detector (b) for the same  
385 calibration samples presented in Figure 1, where the LS11 value is the Rayleigh ratio (a measure  
386 of the scattered light intensity relative to the incident intensity) measured at 90° scattering angle.  
387

388 **S8. Elution times and computed resolution for PS nanoplastics in AF4-UV and AF4-TOC**

389 The peak elution times and computed peak resolution are presented in Figure S6 for  
 390 triplicate runs on the mixtures of PS nanoplastics at various concentrations (representative  
 391 chromatograms in Figures 1 and S5).

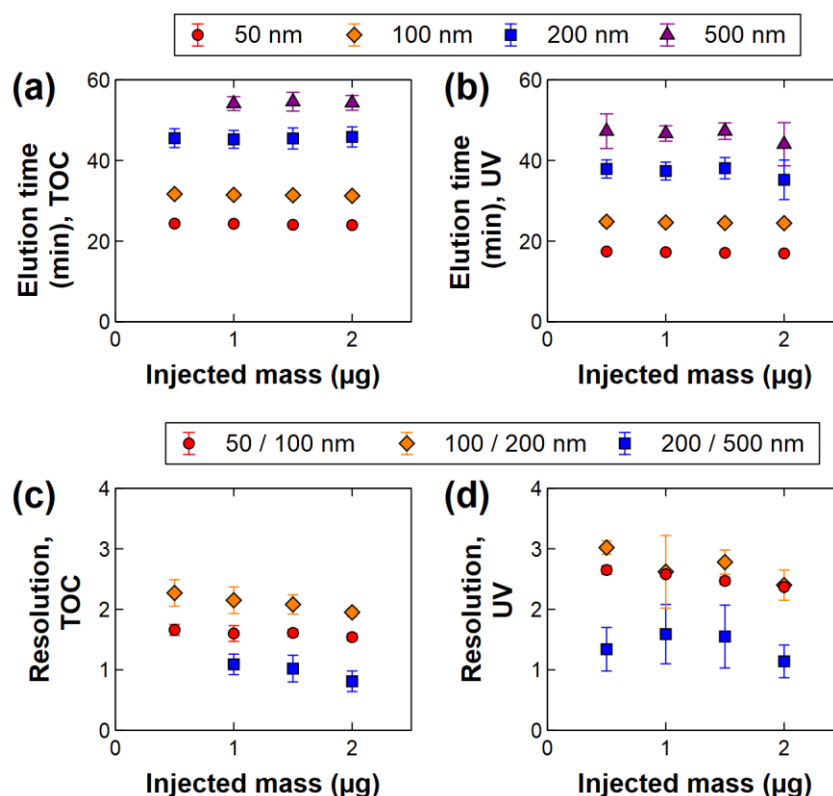

392  
 393 **Figure S6.** Elution times for AF4-TOC (a) and AF4-UV (b) analysis of mixtures of 50 nm, 100  
 394 nm, 200 nm, and 500 nm PS nanoplastics, and resolution computed for adjacent eluting peaks for  
 395 AF4-TOC (c) and AF4-UV (d) analysis. Representative AF4 chromatograms are shown in Figures  
 396 1 and S5. Elution times could not be determined for the lowest concentration of 500 nm particles  
 397 in the TOC analysis because of the peak broadening and overlap with the 200 nm peak. Error bars  
 398 represent the standard deviation across triplicate AF4 runs.

399  
 400 The resolution between adjacent peaks was computed using Equation S4,<sup>14</sup>

401 
$$\text{Resolution} = \frac{\Delta t_R}{\langle w_{FWHM} \rangle} \quad (\text{S4})$$

402 where  $\Delta t_R$  is the difference in peak retention times and  $\langle w_{FWHM} \rangle$  is the mean of the full width at  
403 half-maximum (FWHM) of the two eluting peaks. It is noted that although a resolution  $> 1.5$   
404 represents baseline resolution for Gaussian peaks, here “baseline” resolution values were  
405 computed for cases that do not visually show baseline resolution, which is attributed to the non-  
406 Gaussian peak shapes. Resolution is generally lower for the TOC detector because of the high  
407 dispersion due to mixing with the acid and oxidizer reagents and the large volume between sample  
408 introduction to the TOC analyzer, oxidation of the organic carbon to  $CO_2$ , and detection of the  
409  $CO_2$  generated. However, separation of each of the four sizes of nanoplastics is still largely evident  
410 in the chromatograms, except for the 200 nm and 500 nm peaks at the lowest injected mass (Figure  
411 1b).

412

413

414 **S9. Calibration curves for AF4 analyses and limit of quantitation for AF4-TOC**

415 Calibration curves were developed using peak areas from triplicate AF4 analyses on  
416 mixtures of the four PS nanoplastics sizes at nominal concentrations of (5, 10, 15, and 20) mg L<sup>-1</sup>  
417 of PS, i.e., injected masses of (0.5, 1.0, 1.5, and 2.0) μg for a 100 μL injection volume.  
418 Representative chromatograms are shown in Figures 1 and S5. The TOC, UV<sub>280</sub>, and dRI  
419 calibration curves are presented as the raw measurements in Figure S7 and generally show a linear  
420 response of each detector to each size of nanoplastics.

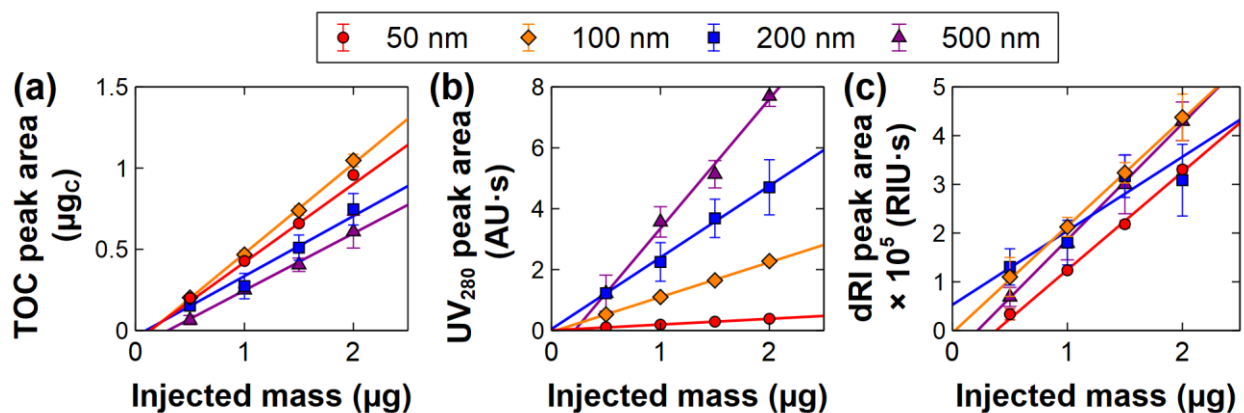

421 **Figure S7.** Calibration curves for AF4 with online TOC (a), UV<sub>280</sub> (b), and dRI (c) detection, as  
422 evaluated using peak areas from AF4 chromatograms on mixtures of 50 nm, 100 nm, 200 nm, and  
423 500 nm PS nanoplastics (representative chromatograms in Figures 1 and S5). TOC signal peak  
424 areas in V·s were converted to μg<sub>C</sub> using the analog conversion factor (1.000 V = 10 mg<sub>C</sub> L<sup>-1</sup>) and  
425 the detector flow rate (0.5 mL min<sup>-1</sup>). Error bars represent the standard deviation across triplicate  
426 AF4 runs.

428  
429 The limit of quantitation (LOQ) for each PS nanoplastics size in the AF4-TOC analysis  
430 was estimated based on the signal-to-noise ratio of the peak height to the standard deviation,  $\sigma$ , in  
431 the baseline noise in the TOC detector signal (e.g.  $\sigma = 3.52 \times 10^{-5}$  V, as measured over 6 min of  
432 baseline data collection at the beginning of a representative sample run). Calibration curves based

433 on TOC peak heights are presented in Figure S8. The LOQ was estimated by extrapolating the  
 434 calibration curves in Figure S8 to the injected mass corresponding to a peak height of  $10\sigma$  for each  
 435 size of PS nanoplastics, as reported in Table S2. Note that given the generally low baseline noise,  
 436 the LOQ is determined largely by the non-zero intercept representing loss of nanoplastics (i.e.,  
 437 incomplete recovery) during the AF4 separation, rather than the baseline noise.

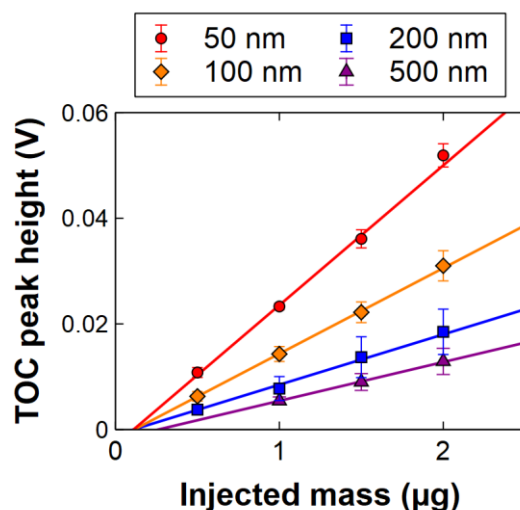

438  
 439 **Figure S8.** TOC peak heights for AF4 with online TOC detection, as evaluated on AF4  
 440 chromatograms on mixtures of 50 nm, 100 nm, 200 nm, and 500 nm PS nanoplastics  
 441 (representative chromatograms in Figures 1 and S5). A peak height could not be determined for  
 442 the lowest concentration of 500 nm particles because of the overlap with the 200 nm peak. Error  
 443 bars represent the standard deviation across triplicate AF4 runs.

444  
 445 **Table S2. Limits of quantitation for PS nanoplastics in AF4-TOC analysis**

| PS Nanoplastic Diameter | LOQ (µg) <sup>†</sup> |
|-------------------------|-----------------------|
| 50 nm                   | 0.14 ± 0.01           |
| 100 nm                  | 0.15 ± 0.02           |
| 200 nm                  | 0.20 ± 0.04           |
| 500 nm                  | 0.28 ± 0.07           |

446 <sup>†</sup>Results are reported as the mean ± standard deviation of triplicate calibration sets.



447 **S9. AF4 analysis of clay and ESHA with individual 200 nm and 500 nm PS nanoplastics**

448 To confirm lack of sensitivity of the TOC detector to the inorganic clay colloids, a mixture  
449 of clay and ESHA was injected for analysis without nanoplastics (Figure S9). In addition, to better  
450 identify the peaks observed by AF4-TOC on the PS mixture of all four sizes with the clay and  
451 ESHA, individual PS sizes of 200 nm and 500 nm (where the clay coelutes) were mixed with clay  
452 and ESHA and analyzed by AF4 to separately identify their elution times (Figure S9).

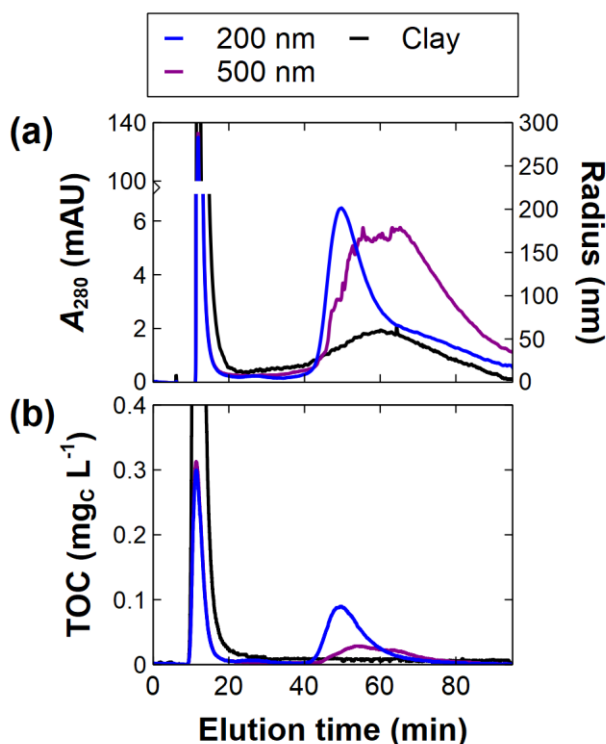

453  
454 **Figure S9.** AF4-UV (a) and AF4-TOC (b) chromatograms for a mixture of 235 mg L<sup>-1</sup> of clay and  
455 10 mg L<sup>-1</sup> of ESHA (black), and individual 200 nm and 500 nm PS nanoplastics spiked at 20 mg  
456 L<sup>-1</sup> into the clay and ESHA mixture. Note the clay-ESHA mixture alone showed a low signal  
457 overall (likely due to membrane fouling) and is scaled by a factor of 5 relative to the other  
458 chromatograms for better visualization.  
459

460 **S10. Influence of clay concentration on AF4 separations and nanoplastics detection**

461 The collected concentration of kaolin clay colloids was  $570 \text{ mg L}^{-1}$  in the supernatant of a  
462  $1 \text{ g L}^{-1}$  clay stock suspension after probe sonication followed by centrifugation, as described in  
463 Section S1.3. In preliminary measurements, the clay was spiked at the as-collected concentration  
464 with the four sizes of PS nanoplastics (at nominal  $20 \text{ mg L}^{-1}$  of each size) and ESHA (at  $10 \text{ mg}_C$   
465  $\text{L}^{-1}$ ). Despite the larger size of the clay colloids ( $\approx 300$  to  $400 \text{ nm}$ , Figure S1a), the clay co-eluted  
466 over both the  $100 \text{ nm}$  and  $200 \text{ nm}$  nanoplastics (Figure S10a) when injected at  $570 \text{ mg L}^{-1}$ , as  
467 observed by comparing the UV signal (which is sensitive to scattering from the clay particles) to  
468 the TOC signal (selective for only the PS nanoplastics). However, larger particles would be  
469 expected to elute later than smaller particles in normal AF4 mode.

470 Overloading of sample has previously been reported to result in more rapid elution than  
471 expected.<sup>15</sup> Hence, a dilution of the clay to  $235 \text{ mg L}^{-1}$  (also spiked with  $20 \text{ mg L}^{-1}$  of each of the  
472 four nanoplastics and  $10 \text{ mg}_C \text{ L}^{-1}$  of ESHA) was evaluated (Figure S10b). Reducing the clay  
473 concentration resulted in successful separation of the UV signal of the  $100 \text{ nm}$  nanoplastics from  
474 that of the clay. These results indicate that sample concentration and overloading effects can be  
475 important to consider, particularly for UV or other detection modes that are sensitive to  
476 interference from species such as natural inorganic colloids if they coelute with the nanoplastics.  
477 However, the TOC detection of the nanoplastics was notably insensitive to the clay particles  
478 regardless of whether overloading occurred (Figure S10), and hence can provide a more robust  
479 evaluation of the nanoplastics concentration as well as the size of the two smaller nanoplastics ( $50$   
480  $\text{nm}$  and  $100 \text{ nm}$ ) based on their elution time. It is again noted that fouling of the AF4 membrane  
481 by the clay colloids resulted in poor distinction and/or diminished recovery of the  $200 \text{ nm}$  and  $500$   
482  $\text{nm}$  PS nanoplastics. This issue is a limitation of the AF4 separation rather than the detectors, but

483 is most straightforward to assess using the TOC detector to selectively probe for the nanoplastics  
484 distinctly from any coeluting clay colloids.

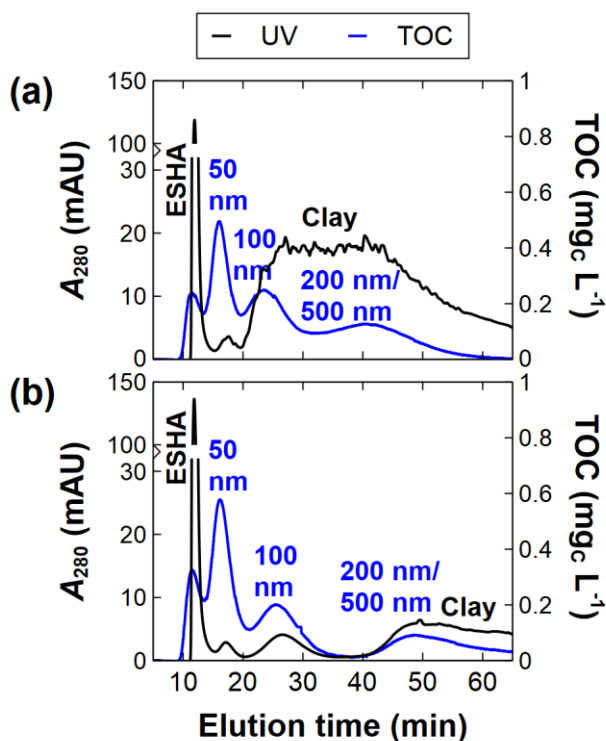

485  
486 **Figure S10.** AF4-UV and AF4-TOC chromatograms for complex mixtures of PS nanoplastics  
487 (nominal 20 mg L<sup>-1</sup> each of 50 nm, 100 nm, 200 nm, and 500 nm), ESHA (10 mgc L<sup>-1</sup>), and clay  
488 colloids at 570 mg L<sup>-1</sup> (a) or 235 mg L<sup>-1</sup> (b). A reliable light scattering analysis could not be  
489 achieved on the nanoplastics in (a) because of the coelution of the clay;  $R_g$  and  $R_h$  for (b) are shown  
490 in Figure 3.  
491

492 **S11. AF4 analysis of PS nanoplastics in complex matrices after staining with Nile Red**

493 AF4 chromatograms are presented in Figure S11 for mixtures of the four sizes of PS  
494 nanoplastics with ESHA and clay colloids.

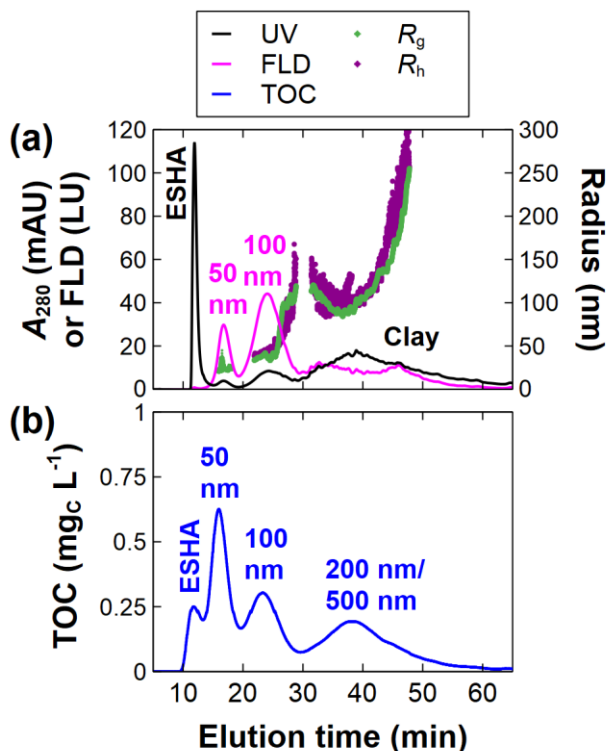

495  
496 **Figure S11.** AF4-UV and AF4-FLD (a) and AF4-TOC (b) chromatograms for complex mixtures  
497 of PS nanoplastics (nominal 20 mg L<sup>-1</sup> each of 50 nm, 100 nm, 200 nm, and 500 nm), ESHA (10  
498 mg<sub>c</sub> L<sup>-1</sup>), and clay colloids at 235 mg L<sup>-1</sup> after staining with 10 mg L<sup>-1</sup> of Nile Red. The R<sub>g</sub> and  
499 R<sub>h</sub> analysis by MALS and DLS, respectively, are provided in (a).

500  
501 The Nile Red staining provides selective detection of the 50 nm and 100 nm nanoplastics  
502 (Figure S11a) relative to the ESHA and clay colloids. However, low uptake of Nile Red by the  
503 200 nm nanoplastics (as verified on AF4-FLD measurements on individually stained and injected  
504 nanoplastics of each size, as well as mixtures of the nanoplastics in Figure 2) resulted in poor  
505 capability to detect the 200 nm nanoplastics. In contrast, TOC analysis provides more robust  
506 detection of all nanoplastics in the mixture, although peak overlap of the ESHA and the 50 nm PS

507 nanoplastics was observed (Figure S11b). The results suggest that AF4-TOC detection and Nile  
508 Red staining for AF4-FLD could potentially be utilized as complementary approaches to  
509 distinguish dissolved organic matter from nanoplastics.

510

511

512 **References**

- 513 1. B. C. Suedel and J. H. Rodgers Jr, *Environ. Toxicol. Chem.*, 1994, **13**, 1163-1175.
- 514 2. B. C. Suedel and J. H. Rodgers Jr, *Environ. Toxicol. Chem.*, 1994, **13**, 1639-1648.
- 515 3. M. C. Eimers, R. Douglas Evans and P. M. Welbourn, *Chemosphere*, 2002, **46**, 543-551.
- 516 4. H. El Hadri, S. M. Louie and V. A. Hackley, *Environ. Sci.: Nano*, 2018, **5**, 203-214.
- 517 5. Agilent Technologies, *Agilent 1260 Infinity Fluorescence Detector: User Manual*,  
518 Waldbronn, Germany, 2013.
- 519 6. F. Gagné, J. Auclair and B. Quinn, *Environ. Sci. Pollut. Res.*, 2019, **26**, 33524-33531.
- 520 7. H. W. Louie and S. M. Louie, Texas Data Repository, 2021,  
521 <https://doi.org/10.18738/T8/LZNHUX>.
- 522 8. M. Andersson, B. Wittgren and K.-G. Wahlund, *Anal. Chem.*, 2003, **75**, 4279-4291.
- 523 9. J. Parot, F. Caputo, D. Mehn, V. A. Hackley and L. Calzolari, *J. Controlled Release*,  
524 2020, **320**, 495-510.
- 525 10. A. A. Bhutto, D. Vesely and B. J. Gabrys, *Polymer*, 2003, **44**, 6627-6631.
- 526 11. J. Gigault, H. El Hadri, S. Reynaud, E. Deniau and B. Grassl, *Anal. Bioanal. Chem.*,  
527 2017, **409**, 6761-6769.
- 528 12. M. Godin, A. K. Bryan, T. P. Burg, K. Babcock and S. R. Manalis, *Appl. Phys. Lett.*,  
529 2007, **91**, 123121.
- 530 13. A. E. Chalykh, V. K. Gerasimov, U. V. Nikulova, A. A. Ezhova and I. A. Gritskova,  
531 *Russ. Chem. Bull.*, 2019, **68**, 1735-1740.
- 532 14. British Standards Institution, *PD ISO/TS 21362:2018: Nanotechnologies — Analysis of*  
533 *nano-objects using asymmetrical-flow and centrifugal field-flow fractionation*, 2018.
- 534 15. M. E. Schimpf, K. Caldwell and J. C. Giddings, eds., *Field-Flow Fractionation*  
535 *Handbook*, John Wiley & Sons, Inc., New York, NY, USA, 2000.
- 536
